# Supplementary material for: The Relationship between Obesity and Clinical Outcomes in Young People with Duchenne Muscular Dystrophy
Source: MDPI journal article supplement (doi:10.3390/nu14163304), 2022-08-12
Supplement: s1 [file s1]

## Supplementary Data

**Supplementary Table S1**

*BMI Status at Ages Five to Nine Years as A Predictor of Time to Loss of Ambulation Using A Cox Proportional Hazards Model <sup>1</sup>*

| Age at BMI measure | BMI status        | Hazard Ratio | 95% CI lower | 95% CI upper | P-value |
|--------------------|-------------------|--------------|--------------|--------------|---------|
| Five years         | <i>Overweight</i> | 1.237        | 0.572        | 2.675        | 0.590   |
|                    | <i>Obese</i>      | 0.644        | 0.178        | 2.338        | 0.504   |
| Six years          | <i>Overweight</i> | 0.602        | 0.242        | 1.499        | 0.276   |
|                    | <i>Obesity</i>    | 0.771        | 0.357        | 1.662        | 0.507   |
| Seven years        | <i>Overweight</i> | 0.930        | 0.470        | 1.839        | 0.834   |
|                    | <i>Obese</i>      | 0.737        | 0.351        | 1.546        | 0.419   |
| Eight years        | <i>Overweight</i> | 0.820        | 0.406        | 1.658        | 0.581   |
|                    | <i>Obese</i>      | 0.714        | 0.368        | 1.383        | 0.317   |
| Nine years         | <i>Overweight</i> | 1.211        | 0.608        | 2.410        | 0.587   |
|                    | <i>Obese</i>      | 0.919        | 0.458        | 1.844        | 0.812   |

<sup>1</sup> *Five years*: event n=30, censored n=45, missing n=80, censored cases before the earliest event in a stratum n=3. *Six years*: event n=37, censored n=49, missing n=71, censored cases before the earliest event in a stratum n=1. *Seven years*: event n=46, censored n=48, missing n=61, excluded loss of ambulation prior to seven years n=3. *Eight years*: event n=52, censored n=41, missing n=56, excluded loss of ambulation prior to eight years n=9. *Nine years*: event n=48, censored n=35, missing n=57, excluded loss of ambulation prior to nine years n=18

Reference category is no overweight or obesity

**Supplementary Table S2*****BMI Status at Ages Five to Nine Years as a Predictor of Time to a 10m Walk/Run Completed in >10 Seconds Using a Cox Proportional Hazards Model <sup>1</sup>***

| <b>Age at BMI measure</b> | <b>BMI status</b> | <b>Hazard Ratio</b> | <b>95% CI lower</b> | <b>95% CI upper</b> | <b>P-value</b> |
|---------------------------|-------------------|---------------------|---------------------|---------------------|----------------|
| <b>Five years</b>         | <i>Overweight</i> | 1.655               | 0.598               | 4.581               | 0.332          |
|                           | <i>Obese</i>      | 0.869               | 0.179               | 4.219               | 0.862          |
| <b>Six years</b>          | <i>Overweight</i> | 0.849               | 0.261               | 2.763               | 0.786          |
|                           | <i>Obese</i>      | 1.236               | 0.420               | 3.633               | 0.700          |
| <b>Seven years</b>        | <i>Overweight</i> | 1.451               | 0.624               | 3.375               | 0.387          |
|                           | <i>Obese</i>      | 1.302               | 0.503               | 3.373               | 0.587          |
| <b>Eight years</b>        | <i>Overweight</i> | 0.648               | 0.251               | 1.675               | 0.371          |
|                           | <i>Obese</i>      | 0.776               | 0.330               | 1.826               | 0.561          |
| <b>Nine years</b>         | <i>Overweight</i> | 1.561               | 0.614               | 3.967               | 0.349          |
|                           | <i>Obese</i>      | 1.363               | 0.549               | 3.386               | 0.505          |

<sup>1</sup> *Five years*: event n=17, censored n=31, missing n=103, censored cases before the earliest event in a stratum n=7. *Six years*: event n=19, censored n=42, missing n=97. *Seven years*: event n=29, censored n=43, missing n=86. *Eight years*: event n=30, censored n=36, missing n=90, excluded 10m walk/run completed in >10 seconds occurred prior to eight years n=2. *Nine years*: event n=28, censored n=30, missing n=95, excluded 10m walk/run completed in >10 seconds occurred prior to nine years n=5  
Reference category is no overweight or obesity

**Supplementary Table S3*****BMI Status at Ages Five to Nine Years as a Predictor of Time to a 10m Walk/Run Completed in 7-10 Seconds Using a Cox Proportional Hazards Model***<sup>1</sup>

| <b>Age at BMI measure</b> | <b>BMI status</b> | <b>Hazard Ratio</b> | <b>95% CI lower</b> | <b>95% CI upper</b> | <b>P-value</b> |
|---------------------------|-------------------|---------------------|---------------------|---------------------|----------------|
| <b>Five years</b>         | <i>Overweight</i> | 0.935               | 0.447               | 1.954               | 0.857          |
|                           | <i>Obese</i>      | 0.440               | 0.100               | 1.941               | 0.278          |
| <b>Six years</b>          | <i>Overweight</i> | 0.913               | 0.405               | 2.058               | 0.826          |
|                           | <i>Obese</i>      | 0.729               | 0.304               | 1.749               | 0.479          |
| <b>Seven years</b>        | <i>Overweight</i> | 0.997               | 0.505               | 1.967               | 0.993          |
|                           | <i>Obese</i>      | 0.702               | 0.330               | 1.493               | 0.359          |
| <b>Eight years</b>        | <i>Overweight</i> | 0.486               | 0.220               | 1.075               | 0.075          |
|                           | <i>Obese</i>      | 0.428               | 0.207               | 0.887               | <b>0.023</b>   |
| <b>Nine years</b>         | <i>Overweight</i> | 0.622               | 0.249               | 1.553               | 0.309          |
|                           | <i>Obese</i>      | 0.585               | 0.275               | 1.241               | 0.162          |

<sup>1</sup> *Five years*: event n=31, censored n=28, missing n=98, censored cases before the earliest event in a stratum n=1. *Six years*: event n=34, censored n=32, missing n=92. *Seven years*: event n=45, censored n=33, missing n=80. *Eight years*: event n=42, censored n=28, missing n=88, excluded 10m walk/run completed in 7-10 seconds occurred prior to eight years n=11. *Nine years*: event n=35, censored n=21, missing n=102, excluded 10m walk/run completed in 7-10 seconds occurred prior to nine years n=20

Reference category if no overweight or obesity

**Supplementary Table S4*****BMI Status at Ages Five to Nine Years of as a Predictor of a Four Stair Climb Completed in >8 Seconds Using a Cox Proportional Hazards Model***<sup>1</sup>

| Age at BMI measure | BMI status        | Hazard Ratio | 95% CI lower | 95% CI upper | P-value |
|--------------------|-------------------|--------------|--------------|--------------|---------|
| <b>Five years</b>  |                   |              |              |              |         |
|                    | <i>Overweight</i> | 0.515        | 0.216        | 1.231        | 0.136   |
|                    | <i>Obese</i>      | 0.537        | 0.149        | 1.941        | 0.343   |
| <b>Six years</b>   |                   |              |              |              |         |
|                    | <i>Overweight</i> | 0.895        | 0.357        | 2.245        | 0.813   |
|                    | <i>Obese</i>      | 0.701        | 0.269        | 1.823        | 0.466   |
| <b>Seven years</b> |                   |              |              |              |         |
|                    | <i>Overweight</i> | 0.842        | 0.404        | 1.758        | 0.647   |
|                    | <i>Obese</i>      | 0.682        | 0.291        | 1.602        | 0.380   |
| <b>Eight years</b> |                   |              |              |              |         |
|                    | <i>Overweight</i> | 0.632        | 0.279        | 1.432        | 0.272   |
|                    | <i>Obese</i>      | 0.507        | 0.225        | 1.142        | 0.101   |
| <b>Nine years</b>  |                   |              |              |              |         |
|                    | <i>Overweight</i> | 0.718        | 0.279        | 1.844        | 0.718   |
|                    | <i>Obese</i>      | 0.619        | 0.263        | 1.454        | 0.619   |

<sup>1</sup> *Five years*: event n=25, censored n=28, missing n=101, censored cases before the earliest event in a stratum n=4. *Six years*: event n=28, censored n=36, missing n=94. *Seven years*: event n=37, censored n=37, missing n=84. *Eight years*: event n=35, censored n=30, missing n=84, excluded four stair climb completed in >8 seconds occurred prior to eight years n=9. *Nine years*: event n=29, censored n=26, missing n=89, excluded four stair climb completed in >8 seconds occurred prior to nine years n=14

Reference category is no overweight or obesity

**Supplementary Table S5*****BMI Status at Ages Five to Nine Years of a Predictor of a Supine-To-Stand Completed in >7 Seconds Using a Cox Proportional Hazards Model <sup>1</sup>***

| <b>Age at BMI measure</b> | <b>BMI status</b> | <b>Hazard Ratio</b> | <b>95% CI lower</b> | <b>95% CI upper</b> | <b>P-value</b> |
|---------------------------|-------------------|---------------------|---------------------|---------------------|----------------|
| <b>Five years</b>         | <i>Overweight</i> | 0.909               | 0.449               | 1.843               | 0.792          |
|                           | <i>Obese</i>      | 0.658               | 0.219               | 1.976               | 0.456          |
| <b>Six years</b>          | <i>Overweight</i> | 1.075               | 0.494               | 2.339               | 0.855          |
|                           | <i>Obese</i>      | 0.770               | 0.339               | 1.750               | 0.532          |
| <b>Seven years</b>        | <i>Overweight</i> | 1.198               | 0.612               | 2.345               | 0.599          |
|                           | <i>Obese</i>      | 0.776               | 0.369               | 1.632               | 0.504          |
| <b>Eight years</b>        | <i>Overweight</i> | 0.723               | 0.334               | 1.565               | 0.410          |
|                           | <i>Obese</i>      | 0.620               | 0.301               | 1.276               | 0.194          |
| <b>Nine years</b>         | <i>Overweight</i> | 0.885               | 0.355               | 2.209               | 0.794          |
|                           | <i>Obese</i>      | 0.638               | 0.299               | 1.361               | 0.245          |

<sup>1</sup> *Five years*: event n=35, censored n=24, missing n=98, censored cases before the earliest event in a stratum n=1. *Six years*: event n=38 censored n=31, missing n=89. *Seven years*: event n=46, censored n=31, missing n=81. *Eight years*: event n=41, censored n=26, missing n=81, excluded supine-to-stand completed in >7 seconds occurred prior to eight years n=10. *Nine years*: event n=34, censored n=20, missing n=81, excluded supine-to-stand completed in >7 seconds occurred prior to nine years n=23

Reference category is no overweight or obesity

**Supplementary Table S6*****BMI Status at Ages Five to Nine Years as a Predictor of a NSAA Score  $\leq 9$  Using a Cox Proportional Hazards Model***<sup>1</sup>

| <b>Age at BMI measure</b> | <b>BMI status</b> | <b>Hazard Ratio</b> | <b>95% CI lower</b> | <b>95% CI upper</b> | <b>P-value</b> |
|---------------------------|-------------------|---------------------|---------------------|---------------------|----------------|
| <b>Five years</b>         | <i>Overweight</i> | 1.317               | 0.505               | 3.436               | 0.573          |
|                           | <i>Obesity</i>    | 0.751               | 0.158               | 3.578               | 0.719          |
| <b>Six years</b>          | <i>Overweight</i> | 1.894               | 0.694               | 5.167               | 0.212          |
|                           | <i>Obesity</i>    | 1.516               | 0.491               | 4.678               | 0.469          |
| <b>Seven years</b>        | <i>Overweight</i> | 2.082               | 0.846               | 5.124               | 0.110          |
|                           | <i>Obesity</i>    | 1.089               | 0.326               | 3.642               | 0.889          |
| <b>Eight years</b>        | <i>Overweight</i> | 0.747               | 0.260               | 2.147               | 0.588          |
|                           | <i>Obesity</i>    | 1.080               | 0.450               | 2.593               | 0.863          |
| <b>Nine years</b>         | <i>Overweight</i> | 1.076               | 0.386               | 3.003               | 0.889          |
|                           | <i>Obesity</i>    | 1.461               | 0.582               | 3.665               | 0.419          |

<sup>1</sup> *Five years*: event n=19, censored n=32, missing n=104, censored cases before the earliest event in a stratum n=3. *Six years*: event n=21 censored n=39, missing n=98. *Seven years*: event n=24, censored n=42, missing n=92. *Eight years*: event n=27, censored n=35, missing n=94, excluded NSAA score  $\leq 9$  occurred prior to eight years n=2. *Nine years*: event n=27, censored n=29, missing n=98, excluded NSAA score  $\leq 9$  occurred prior to nine years n=4

Reference category is no overweight or obesity

**Supplementary Table S7*****BMI Status at Ages Five to Nine Years as a Predictor of a 6MWD <325m Using a Cox Proportional Hazards Model <sup>1</sup>***

| <b>Age at BMI measure</b> | <b>BMI status</b> | <b>Hazard Ratio</b> | <b>95% CI lower</b> | <b>95% CI upper</b> | <b>P-value</b> |
|---------------------------|-------------------|---------------------|---------------------|---------------------|----------------|
| <b>Five years</b>         | <i>Overweight</i> | 0.411               | 0.088               | 1.912               | 0.257          |
|                           | <i>Obesity</i>    | 0.205               | 0.021               | 2.023               | 0.175          |
| <b>Six years</b>          | <i>Overweight</i> | 1.049               | 0.267               | 4.122               | 0.945          |
|                           | <i>Obesity</i>    | 0.487               | 0.091               | 2.611               | 0.401          |
| <b>Seven years</b>        | <i>Overweight</i> | 0.752               | 0.230               | 2.464               | 0.638          |
|                           | <i>Obesity</i>    | 0.523               | 0.130               | 2.107               | 0.362          |
| <b>Eight years</b>        | <i>Overweight</i> | 0.864               | 0.254               | 2.943               | 0.815          |
|                           | <i>Obesity</i>    | 0.567               | 0.185               | 1.742               | 0.322          |
| <b>Nine years</b>         | <i>Overweight</i> | 1.248               | 0.360               | 4.333               | 0.727          |
|                           | <i>Obesity</i>    | 0.876               | 0.293               | 2.614               | 0.812          |

<sup>1</sup> *Five years*: event n=9, censored n=13, missing n=126, censored cases before the earliest event in a stratum n=10. *Six years*: event n=11 censored n=14, missing n=123, censored cases before the earliest event in a stratum n=10. *Seven years*: event n=15, censored n=23, missing n=118, censored cases before the earliest event in a stratum n=2. *Eight years*: event n=17, censored n=24, missing n=117. *Nine years*: event n=17, censored n=17, missing n=122, excluded 6MWD <325m occurred prior to nine years n=2  
Reference category is no overweight or obesity

**Supplementary Table S8*****BMI Status at Ages Five to Nine Years of as a Predictor of First Fracture Using a Cox Proportional Hazards Model (Unadjusted) <sup>1</sup>***

| <b>Age at BMI measure</b> | <b>BMI status</b> | <b>Hazard Ratio</b> | <b>95% CI lower</b> | <b>95% CI upper</b> | <b>P-value</b> |
|---------------------------|-------------------|---------------------|---------------------|---------------------|----------------|
| <b>Five years</b>         | <i>Overweight</i> | 0.523               | 0.241               | 1.135               | 0.101          |
|                           | <i>Obesity</i>    | 2.197               | 0.970               | 4.975               | 0.059          |
| <b>Six years</b>          | <i>Overweight</i> | 2.022               | 0.930               | 4.396               | 0.076          |
|                           | <i>Obesity</i>    | 2.082               | 0.970               | 4.470               | 0.060          |
| <b>Seven years</b>        | <i>Overweight</i> | 1.256               | 0.622               | 2.539               | 0.525          |
|                           | <i>Obesity</i>    | 1.776               | 0.875               | 3.605               | 0.112          |
| <b>Eight years</b>        | <i>Overweight</i> | 1.404               | 0.676               | 2.915               | 0.363          |
|                           | <i>Obesity</i>    | 1.862               | 0.927               | 3.739               | 0.081          |
| <b>Nine years</b>         | <i>Overweight</i> | 0.957               | 0.437               | 2.096               | 0.912          |
|                           | <i>Obesity</i>    | 2.050               | 1.038               | 4.046               | <b>0.039*</b>  |

<sup>1</sup> *Five years*: event n=37, censored n=36, missing n=79, censored cases before the earliest event in a stratum n=4, excluded first fracture before five years n=2. *Six years*: event n=40 censored n=44, missing n=71, censored cases before the earliest event in a stratum n=1, excluded first fracture before six years n=2. *Seven years*: event n=47, censored n=46, missing n=60, excluded first fracture before seven years n=5. *Eight years*: event n=47, censored n=39, missing n=58, excluded first fracture before seven years n=13. *Nine years*: event n=45, censored n=37, missing n=57, excluded first fracture prior to nine years n=19. Reference category is no overweight or obesity



**Supplementary Table S9*****BMI Status at Ages Five to Nine Years as a Predictor of Scoliosis Using a Cox Proportional Hazards Model <sup>1</sup>***

| <b>Age at BMI measure</b> | <b>BMI status</b> | <b>Hazard Ratio</b> | <b>95% CI lower</b> | <b>95% CI upper</b> | <b>P-value</b> |
|---------------------------|-------------------|---------------------|---------------------|---------------------|----------------|
| <b>Five years</b>         | <i>Overweight</i> | 0.572               | 0.167               | 1.959               | 0.374          |
|                           | <i>Obesity</i>    | 0.536               | 0.065               | 4.394               | 0.561          |
| <b>Seven years</b>        | <i>Overweight</i> | 0.310               | 0.090               | 1.074               | 0.065          |
|                           | <i>Obesity</i>    | 0.735               | 0.267               | 2.025               | 0.552          |
| <b>Eight years</b>        | <i>Overweight</i> | 1.077               | 0.441               | 2.630               | 0.870          |
|                           | <i>Obesity</i>    | 0.544               | 0.181               | 1.636               | 0.279          |
| <b>Nine years</b>         | <i>Overweight</i> | 0.472               | 0.165               | 1.345               | 0.160          |
|                           | <i>Obesity</i>    | 0.828               | 0.348               | 1.970               | 0.669          |

<sup>1</sup> *Five years*: event n=12, censored n=53, missing n=80, censored cases before the earliest event in a stratum n=13. *Six years*: not able to be performed as coefficients did not converge. *Seven years*: event n=23, censored n=73, missing n=61, censored cases before the earliest event in a stratum n=1. *Eight years*: event n=27, censored n=65, missing n=61, censored cases before the earliest event in a stratum n=3, excluded scoliosis diagnosis before eight years n=2. *Nine years*: event n=26, censored n=65, missing n=61, censored cases before the earliest event in a stratum n=1, excluded scoliosis diagnosis prior to nine years n=5

Reference category is no overweight or obesity

**Supplementary Table S10*****BMI Status at Ages Five to Nine Years as a Predictor of OSA Using a Cox Proportional Hazards Model***<sup>1</sup>

| Age at BMI measure | BMI status        | Hazard Ratio | 95% CI lower | 95% CI upper | P-value      |
|--------------------|-------------------|--------------|--------------|--------------|--------------|
| Five years         | <i>Overweight</i> | 1.212        | 0.585        | 2.510        | 0.605        |
|                    | <i>Obese</i>      | 1.257        | 0.444        | 3.561        | 0.667        |
| Six years          | <i>Overweight</i> | 2.590        | 1.175        | 5.711        | <b>0.018</b> |
|                    | <i>Obese</i>      | 3.389        | 1.469        | 7.815        | <b>0.004</b> |
| Seven years        | <i>Overweight</i> | 1.476        | 0.737        | 2.955        | 0.272        |
|                    | <i>Obese</i>      | 2.163        | 1.004        | 4.660        | <b>0.049</b> |
| Eight years        | <i>Overweight</i> | 0.659        | 0.281        | 1.546        | 0.338        |
|                    | <i>Obese</i>      | 2.461        | 1.245        | 4.863        | <b>0.010</b> |
| Nine years         | <i>Overweight</i> | 0.621        | 0.274        | 1.411        | 0.255        |
|                    | <i>Obese</i>      | 2.883        | 1.481        | 5.612        | <b>0.002</b> |

<sup>1</sup> *Five years*: event n=35, censored n=41, missing n=78, censored cases before the earliest event in a stratum n=1, excluded OSA diagnosis before five years n=3 *Six years*: event n=37, censored n=49, missing n=67, excluded OSA diagnosis before six years n=5. *Seven years*: event n=44, censored n=48, missing n=58, excluded OSA diagnosis before seven years n=8. *Eight years*: event n=45, censored n=46, missing n=57, excluded OSA diagnosis before eight years n=10. *Nine years*: event n=47, censored n=43, missing n=55, excluded OSA diagnosis prior to nine years n=13

Reference category is no overweight or obesity

**Supplementary Table S11*****BMI Status at Ages Five to Nine Years as a Predictor of CPAP Initiation Using a Cox Proportional Hazards Model***<sup>1</sup>

| Age at BMI measure | BMI status        | Hazard Ratio | 95% CI lower | 95% CI upper | P-value      |
|--------------------|-------------------|--------------|--------------|--------------|--------------|
| Six years          | <i>Overweight</i> | 0.528        | 0.065        | 4.313        | 0.551        |
|                    | <i>Obesity</i>    | 2.716        | 0.904        | 8.155        | 0.075        |
| Seven years        | <i>Overweight</i> | 3.785        | 1.137        | 12.598       | 0.030        |
|                    | <i>Obesity</i>    | 3.735        | 1.053        | 13.252       | <b>0.041</b> |
| Eight years        | <i>Overweight</i> | 0.476        | 0.104        | 2.177        | 0.338        |
|                    | <i>Obesity</i>    | 2.207        | 0.824        | 5.909        | 0.115        |
| Nine years         | <i>Overweight</i> | 0.764        | 0.248        | 2.352        | 0.639        |
|                    | <i>Obesity</i>    | 2.117        | 0.843        | 5.316        | 0.110        |

<sup>1</sup> *Five years*: not able to be performed as coefficients did not converge. *Six years*: event n=14, censored n=54, missing n=70, censored cases before the earliest event in a stratum=20. *Seven years*: event n=18, censored n=64, missing n=61, censored cases before the earliest event in a stratum n=15. *Eight years*: event n=19, censored n=70, missing n=61, censored cases before the earliest event in a stratum n=8. *Nine years*: event n=24, censored n=71, missing n=63

Reference category is no overweight or obesity

**Supplementary Table S12*****BMI Status at Ages Five to Nine Years of as a Predictor of FVC <1L Using a Cox Proportional Hazards Model***<sup>1</sup>

| Age at BMI measure | BMI status        | Hazard Ratio | 95% CI lower | 95% CI upper | P-value |
|--------------------|-------------------|--------------|--------------|--------------|---------|
| Six years          | <i>Overweight</i> | 1.046        | 0.270        | 4.045        | 0.948   |
|                    | <i>Obesity</i>    | 0.919        | 0.243        | 3.480        | 0.901   |
| Seven years        | <i>Overweight</i> | 1.194        | 0.412        | 3.458        | 0.744   |
|                    | <i>Obesity</i>    | 0.762        | 0.202        | 2.881        | 0.689   |
| Eight years        | <i>Overweight</i> | 0.623        | 0.113        | 3.429        | 0.586   |
|                    | <i>Obesity</i>    | 2.716        | 0.773        | 9.547        | 0.119   |

<sup>1</sup> *Five and eight years:* Not able to be performed as coefficients did not converge. *Six years:* event n=14, censored n=59, missing n=85. *Seven years:* event n=17, censored n=71, missing n=70. *Nine years:* event n=13, censored n=62, missing n=72, censored cases before the earliest event in a stratum n=11  
Reference category is no overweight or obesity

**Supplementary Table S13*****Predictors of Obesity Using a Generalized Estimating Equation (N=138 Patients, N=2246 Observations)***

| <b>Predictors <sup>1</sup></b>                                                            | <b>OR</b> | <b>95% CI<br/>lower</b> | <b>95% CI<br/>upper</b> | <b>P-value <sup>2</sup></b> |
|-------------------------------------------------------------------------------------------|-----------|-------------------------|-------------------------|-----------------------------|
| (Intercept)                                                                               | 0.918     | 0.618                   | 1.363                   | 0.671                       |
| Age                                                                                       | 0.991     | 0.971                   | 1.011                   | 0.392                       |
| Length of follow-up                                                                       | 0.994     | 0.971                   | 1.018                   | 0.642                       |
| Age at diagnosis                                                                          | 1.012     | 0.968                   | 1.059                   | 0.591                       |
| Ambulant <sup>a</sup>                                                                     | 0.921     | 0.806                   | 1.054                   | 0.231                       |
| ≥7 seconds in a 10m walk/run <sup>b</sup>                                                 | 1.132     | 0.933                   | 1.375                   | 0.209                       |
| 10m walk/run data missing <sup>b</sup>                                                    | 1.153     | 0.958                   | 1.387                   | 0.132                       |
| ≥ 1 fracture <sup>c</sup>                                                                 | 1.103     | 0.955                   | 1.273                   | 0.182                       |
| ≥ 1 dietitian consult <sup>d</sup>                                                        | 1.188     | 1.064                   | 1.327                   | <b>0.002</b>                |
| Scoliosis surgery (yes) <sup>e</sup>                                                      | 0.449     | 0.351                   | 0.574                   | <b>&lt;0.001</b>            |
| Steroid-treated prednisolone only <sup>f</sup>                                            | 1.090     | 0.978                   | 1.215                   | 0.120                       |
| Steroid-treated prednisolone then deflazacort <sup>f</sup>                                | 1.298     | 1.093                   | 1.543                   | <b>0.003</b>                |
| Steroid-treated vamorolone <sup>f</sup>                                                   | 1.297     | 0.445                   | 3.774                   | 0.634                       |
| Dystrophin isoforms maintained: Dp140, Dp116 and Dp71 (Category 2) <sup>g</sup>           | 0.776     | 0.577                   | 1.043                   | 0.093                       |
| Dystrophin isoforms maintained: Dp116 and Dp71 (category 3) <sup>g</sup>                  | 0.941     | 0.789                   | 1.123                   | 0.501                       |
| Dystrophin isoforms maintained: Dp71 OR nothing maintained (Category 4 or 5) <sup>g</sup> | 0.830     | 0.583                   | 1.182                   | 0.302                       |
| Unknown/missing genetic information <sup>g</sup>                                          | 0.782     | 0.645                   | 0.948                   | <b>0.012</b>                |
| Diagnosis of a neurodevelopmental disability <sup>h</sup>                                 | 0.826     | 0.695                   | 0.983                   | <b>0.031</b>                |

<sup>1</sup> Reference categories are: <sup>a</sup>Non-ambulant <sup>b</sup>Less than 7 second <sup>c</sup>No fracture <sup>d</sup>No dietitian consult <sup>e</sup>No scoliosis surgery <sup>f</sup>Steroid-naïve <sup>g</sup>Dp260, Dp140, Dp116 and Dp71 maintained <sup>h</sup>No diagnosis of neurodevelopmental disability

<sup>2</sup> P-values in boldface indicate statistical significance using a p-value of <0.05
